# Supplementary material for: Beetle luciferases with naturally red- and blue-shifted emission
Source: Life Sci Alliance. 2018 Aug 16;1(4):e201800072. doi: 10.26508/lsa.201800072 (PMC6238593; doi:10.26508/lsa.201800072)
Supplement: Supplementary file 2 [file LSA-2018-00072_TableS2.docx]

**Supplementary Table 2**. TD-DFT/MM emission for electronic transition between S1 and S0 for the model GBAv-closed-insert-R356 (resulting from the insertion of Arg 356). TD-DFT/MM done with 6-311G(2d,p) basis set and B3LYP functional on structure optimized at the same level of theory.

| Model*a* | TD-DFT/MM  in eV*b* |
| --- | --- |
| Snapshot (1) | 2.25 (550) |
| Snapshot (2) | 2.25 (550) |
| Snapshot (3) | 2.23 (553) |
| GBAv-closed snapshot (1) of Supplementary Table 2 | 2.32 (535) |

*a*The values in parentheses represent the number of the snapshot extracted from the corresponding MD simulation.

*b*The associated wavelengths in nm are given in parentheses.
